# Supplementary material for: Protein sequence and structure alignments within one framework
Source: Springer Nature journal article supplement (doi:10.1186/1748-7188-3-4), 2008-04-01

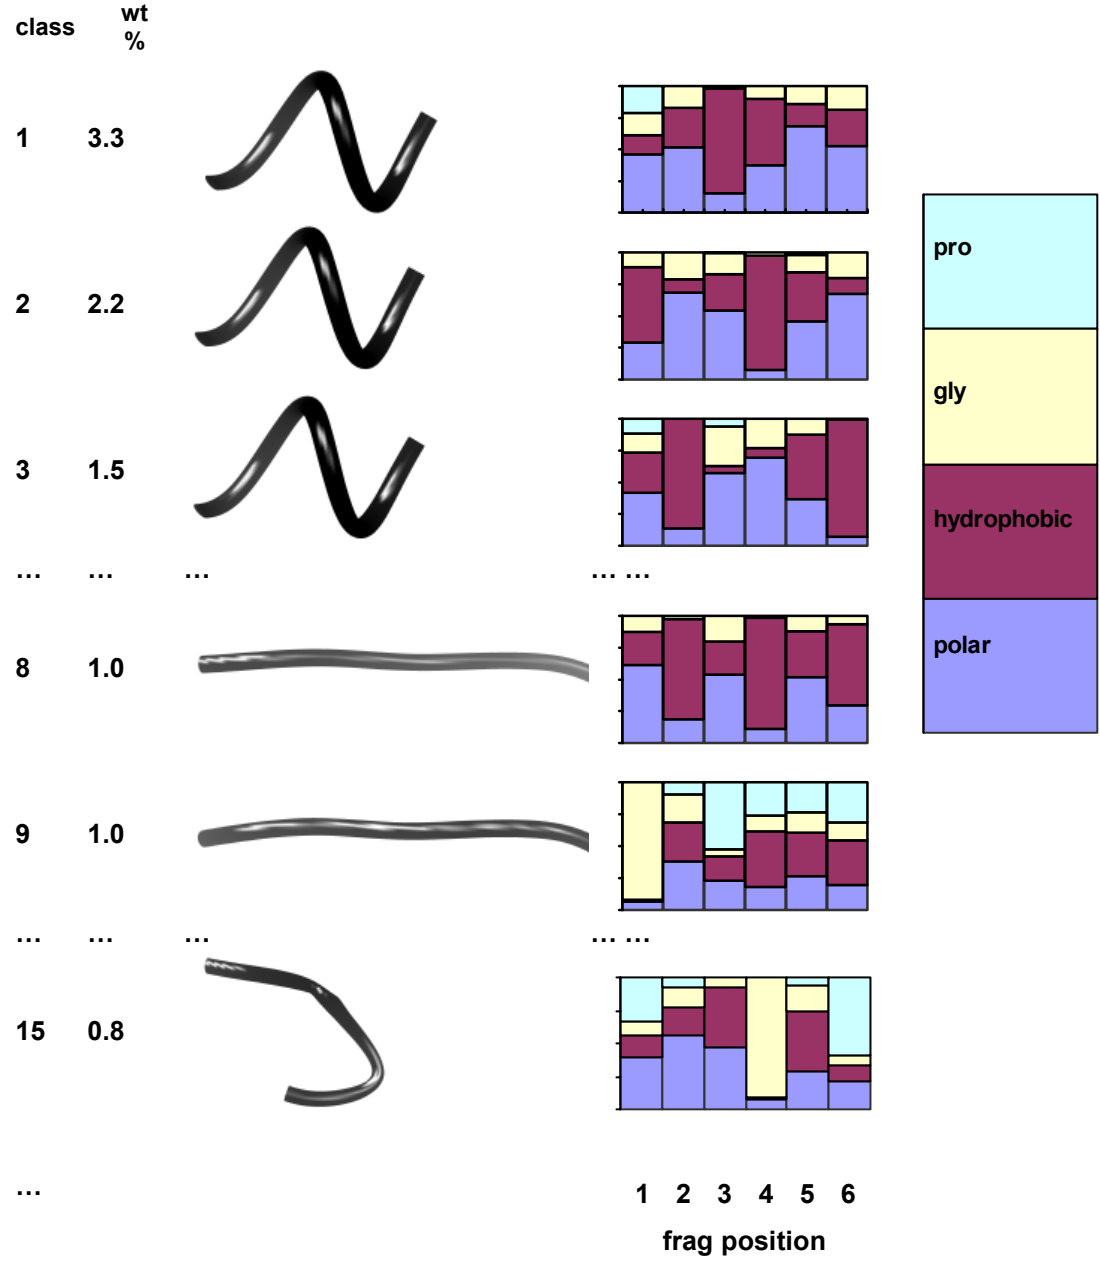

Supplement: 13015_2008_45_MOESM6_ESM.pdf [file 13015_2008_45_MOESM6_ESM.pdf]
